# Supplementary material for: Combined Inhibition of Insulin Growth Factor 1 Receptor and Autophagy impede Colorectal Cancer Metastasis
Source: Research Square preprint supplement (doi:10.21203/rs.3.rs-7081271/v1), 2025-08-18
Supplement: Supplementary file 1 [file d7257edb62d8d5059842709d.docx]

**Supplementary Information**

***“Combined Inhibition of Insulin Growth Factor 1 Receptor and Autophagy impede Colorectal Cancer Metastasis”***

Eglal Mahgoub1,2, Kholoud Bajbouj§1,2, Samrein B. Ahmed§3, Shirin Hafezi2, Leen Aldohaji2, Thenmozhi [Venkatachalam](https://www.frontiersin.org/people/u/1074715)4, Mahmood Hachim5, Tasneem Al Hamidi2, Jasmin Shafarin2, Wael M. Abdel-Rahman2,6, Nabil Sulaiman1,7,8, Rifat Hamoudi1,2,9,10, Jalal Taneera1,2, Ritu Lakhtakia5, Iman M. Talaat1,2,11, Maha Saber-Ayad1,12

1College of Medicine, University of Sharjah, Sharjah 27272, United Arab Emirates

2Research Institute of Medical and Health Sciences, University of Sharjah, Sharjah 27272, United Arab Emirates

3College of Health, Wellbeing and Life Sciences, School of Biosciences and Chemistry, Biomolecular Sciences Research Centre, Sheffield Hallam University, Sheffield S1 1WB, United Kingdom.

4Khalifa University, Abu Dhabi, United Arab Emirates.

5College of Medicine, Mohammed bin Rashid University of Medicine and Health Sciences, Dubai, United Arab Emirates.

6Department of Medical Laboratory Sciences, College of Health Sciences, University of Sharjah, Sharjah, United Arab Emirates.

7Baker Heart and Diabetes Institute, Melbourne, Victoria, Australia.

8University of Melbourne, Melbourne, Victoria, Australia.

9Division of Surgery and Interventional Sciences, University College London, London, United Kingdom

10 BIMAI-Lab, Biomedically Informed Artificial Intelligence Laboratory, University of Sharjah, Sharjah P.O. Box 27272, United Arab Emirates.

11Faculty of Medicine, Alexandria University, Alexandria, 21131, Egypt.

12Faculty of Medicine, Cairo University, Giza, Egypt.

*** Correspondence:**

[msaber@sharjah.ac.ae](mailto:msaber@sharjah.ac.ae)

§ Equal contribution

**Figure S1:** Silencing of IGF-1R in HCT116, HT29, LoVo and SK-CO-1.


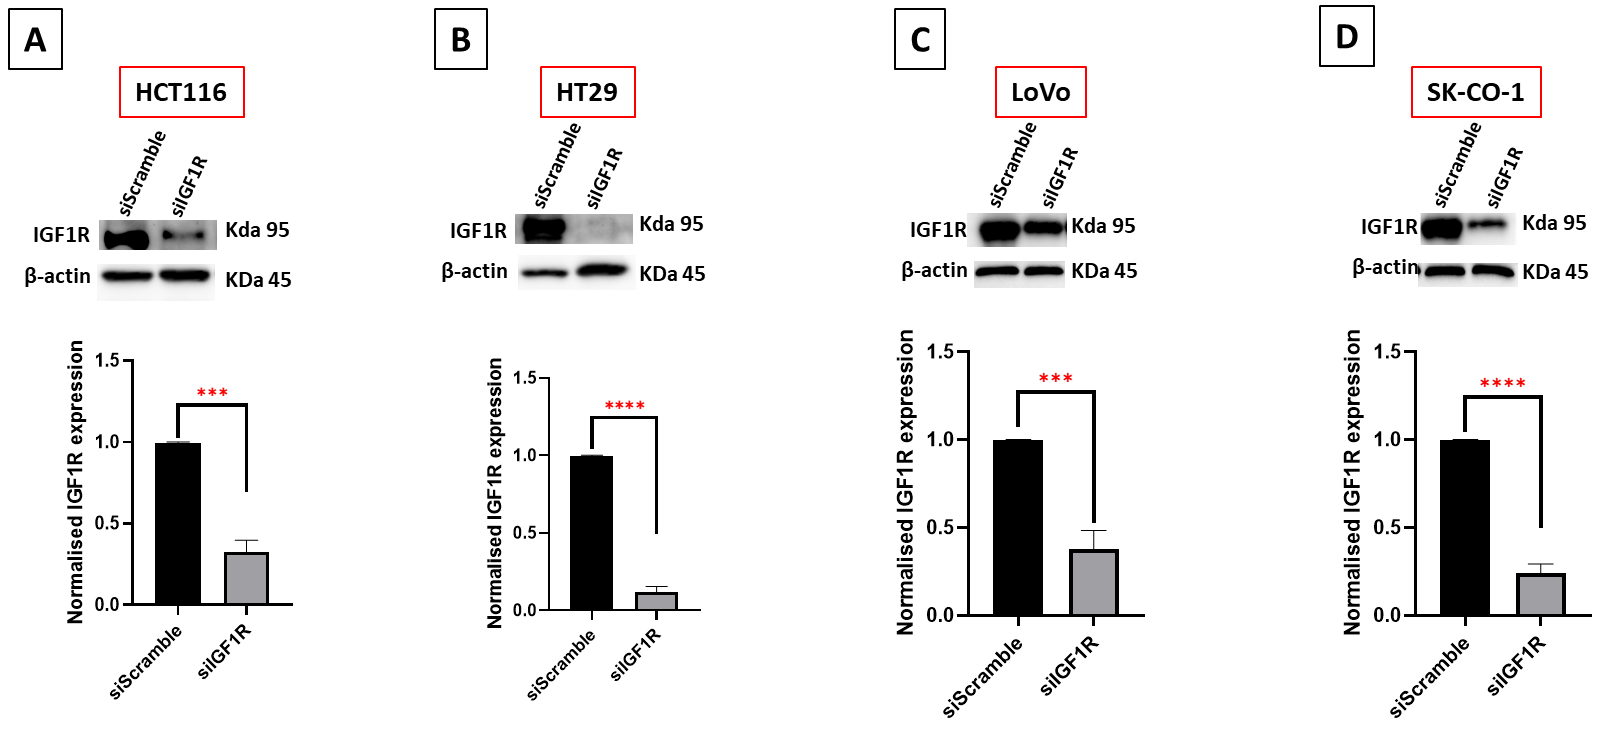


Figure S1: Protein expression analysis of IGF-1R protein expression in IGF-1R-silenced cells (upper panel) and fold changes of the immunoblot band (lower panel) in CRC cells: (**A**) HCT116, (**B**) HT29, (**C**) LoVo, and (**D**) SK-CO-1. The values were compared using independent student’s t-test between each two groups. ∗∗∗ p < 0.001 and ∗∗∗∗ p < 0.0001. Bars represent mean ± SD.

**Figure S2: Full blots of Figure 1E**


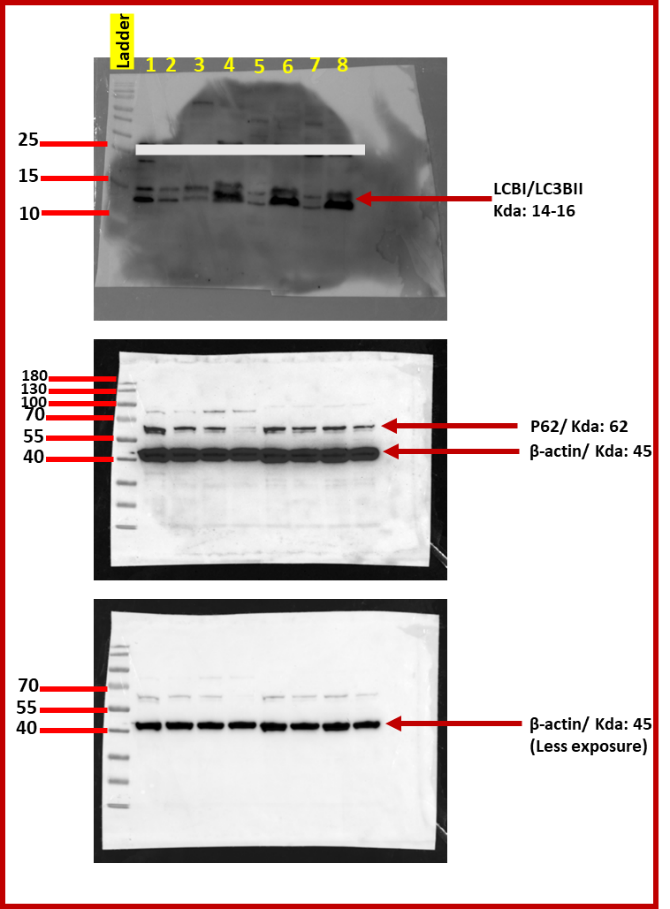


Figure S2: Original uncropped western blot of Figure **1E**. The figure shows the uncropped western blot of LC3BI-LC3BII and P62, normalized to β-actin proteins bands, after treatment with IGF-1 in comparison to control untreated cells.

**Lanes descriptions:**

**1: HCT116-control**

**2: HCT116-IGF-1 treated**

**3: HT29-control**

**4: HT29-IGF-1 treated**

**5: LoVo-control**

**6: LoVo-IGF-1 treated**

**7: SK-CO-1- control**

**8: SK-CO-1-IGF-1 treated**

**Figure S3: Full blots of Figure 1F**


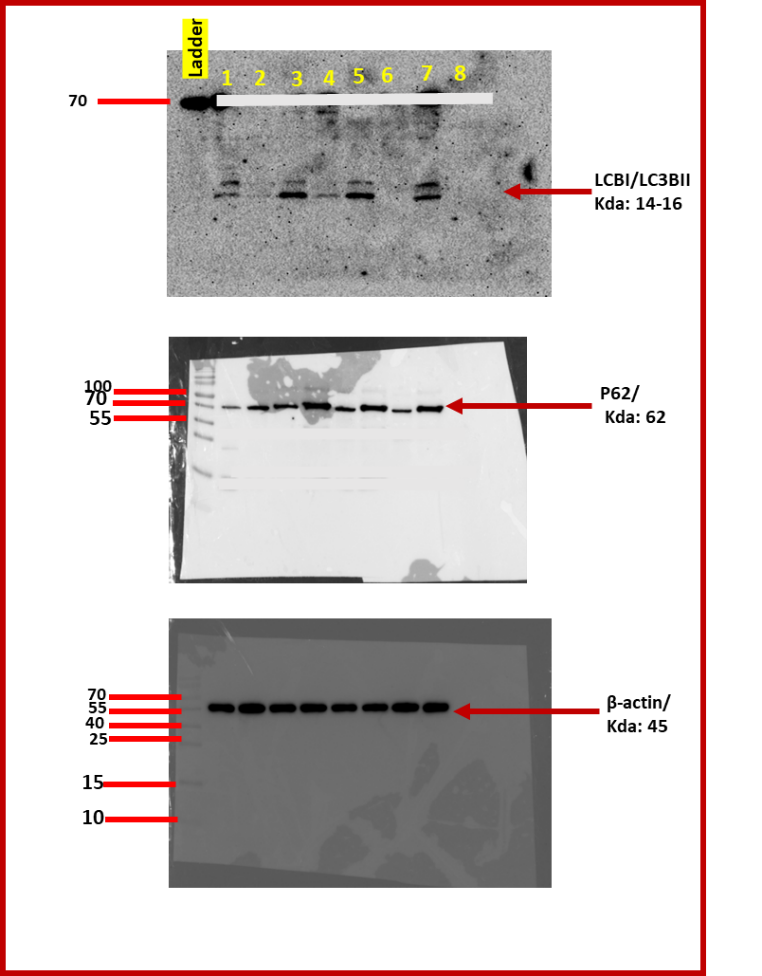


Figure S2: Original uncropped western blot of Figure **1F**. The figure shows the uncropped western blot of LC3BI-LC3BII and P62, normalized to β-actin proteins bands, comparing transfected cells with siIGF-1R vs siScramble.

**Lanes descriptions:**

**1: HCT116-siScramble**

**2: HCT116-siIGF-1R**

**3: HT29-siScramble**

**4: HT29-siIGF-1R**

**5: LoVo-siScramble**

**6: LoVo-siIGF-1R**

**7: SK-CO-1- siScramble**

**8: SK-CO-1-siIGF-1R**

**Figure S4: Target sequence of CRISPR-Cas9 gene editing of ATG5 and ATG7 genes.**

**ATG5**

CRISPR677527_SGM

Target DNA Sequence TCCGATTGATGGCCCAAAAC

PAM Sequence TGG

Target locus Chr.6: 106248212 - 106248234 on GRCh38

Strand Forward

Application Gene Knockout

**ATG7**

CRISPR1032813_SGM

Target DNA Sequence CTTGAAAGACTCGAGTGTGT

PAM Sequence TGG

Target locus Chr.3: 11306996 - 11307018 on GRCh38

Strand Forward

Application Gene Knockout

Figure S4: CRISPR-Cas9 target sequences to knockout ATG5 and ATG7 genes in HCT116 cell line.

**Figure S5: Full blots of Figure 2A**


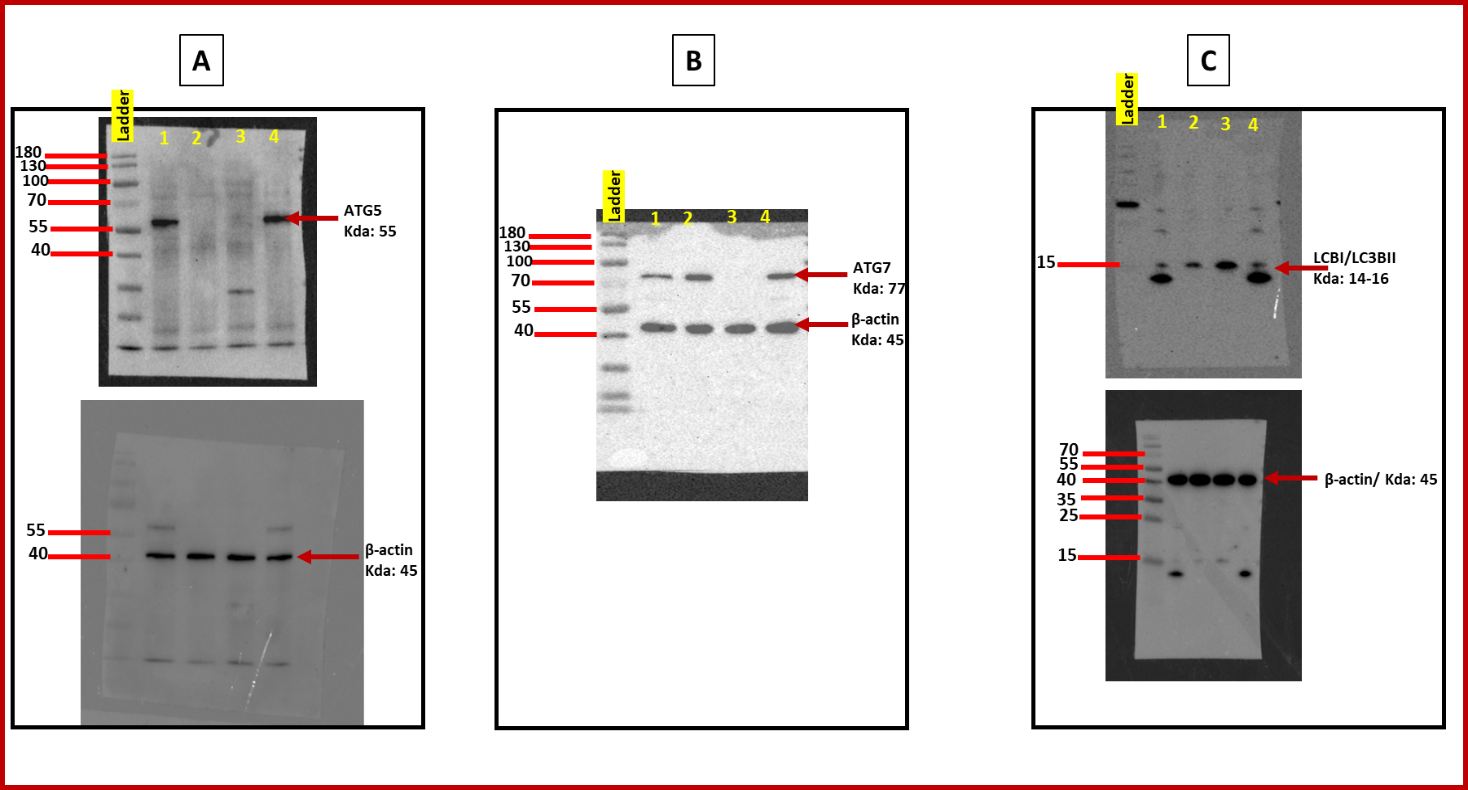


Figure S4: Original uncropped western blot of Figure **2A**. The figure shows the uncropped western blot of (**A**) ATG5, (**B**) ATG7 and (**C**) LC3BI-LC3BII, each normalized to β-actin proteins bands, in HCT116, ATG5-/-, ATG7-/- and NC cells.

**Lanes descriptions:**

**1: HCT116 cells**

**2: ATG5-/- cells**

**3: ATG7-/- cells**

**4: NC cells**
